# Supplementary material
Source: ML conference proceedings conference paper supplement (https://proceedings.neurips.cc/paper_files/paper/2013/hash/74071a673307ca7459bcf75fbd024e09-Abstract.html)
Supplement: Supplementary file [file 74071a673307ca7459bcf75fbd024e09-Supplemental.zip]

## A Proofs

**Lemma 11** (Stick Tracing). *Fix straight lines  $L = \{\langle r_0, r_1 \rangle \mid ar_0 + br_1 + c = 0\}$  and  $\Lambda = \{\langle r_0, r_1 \rangle \mid \alpha r_0 + \beta r_1 + \gamma = 0\}$ . The points  $\langle r_0, r_1 \rangle$  such that there is a  $p$  for which the point  $\langle r_0, r_1 \rangle + \langle p, p-1 \rangle$  lies on the line  $L$  and the point  $\langle r_0, r_1 \rangle - \langle p, p-1 \rangle$  lies on the line  $\Lambda$  form a straight line.*

*Proof.* The points  $\langle r_0, r_1 \rangle$  in question satisfy for some  $p$

$$\begin{aligned} a(r_0 + p) + b(r_1 + p - 1) + c &= 0, \\ \alpha(r_0 - p) + \beta(r_1 - p + 1) + \gamma &= 0. \end{aligned}$$

Eliminating  $p$ , we find that the solution set equals

$$(a(\alpha + \beta) + \alpha(a + b))r_0 + (b(\alpha + \beta) + \beta(a + b))r_1 + (a + b)(\beta + \gamma) + (\alpha + \beta)(c - b) = 0,$$

which is a straight line as required.  $\square$

**Lemma 12.** *We use the notation of Theorem 6. The system of linear equations*

$$\begin{aligned} \langle r_0, r_1 \rangle - \langle p, p-1 \rangle &= \langle f_{T-1}(i-1), f_{T-1}(T-i) \rangle \\ \langle r_0, r_1 \rangle + \langle p, p-1 \rangle &= \langle f_{T-1}(i), f_{T-1}(T-1-i) \rangle \end{aligned}$$

*has unique solution*

$$r_0 = f_T(i), \quad r_1 = f_T(T-i) \quad \text{and} \quad p = p_T(i).$$

*Proof.* The solution set of the system can be rewritten to

$$\begin{aligned} \langle r_0, r_1 \rangle &= \frac{\langle f_{T-1}(i), f_{T-1}(T-1-i) \rangle + \langle f_{T-1}(i-1), f_{T-1}(T-i) \rangle}{2} \\ \langle p, 1-p \rangle &= \frac{\langle f_{T-1}(i) - f_{T-1}(i-1), f_{T-1}(T-i) - f_{T-1}(T-1-i) \rangle}{2} \end{aligned}$$

Notice that the system is over-constrained, so we are essentially checking that it involves a redundant constraint. It remains to verify that the proposed solution fits. We do this for  $r_0$  and  $p$ , the cases for  $r_1$  and  $1-p$  follow by symmetry when exchanging  $i$  and  $T-i$ .

To see that  $r_0 = f_T(i)$ , we rewrite

$$\begin{aligned} f_{T-1}(i-1) + f_{T-1}(i) &= \sum_{j=0}^{i-1} j2^{j-T+1} \binom{T-j-2}{T-i-1} + \sum_{j=0}^i j2^{j-T+1} \binom{T-j-2}{T-i-2} = \\ 2 \sum_{j=0}^i j2^{j-T} \left( \binom{T-j-2}{T-i-1} + \binom{T-j-2}{T-i-2} \right) &= 2 \sum_{j=0}^i j2^{j-T} \binom{T-j-1}{T-i-1} = 2f_T(i) \end{aligned}$$

The case for  $p = p_T(i)$  holds by definition.  $\square$

### A.1 More than 2 experts

We now show how to achieve the bound  $R_T^k \leq \sqrt{-cT \ln q(k)}$  for an arbitrary prior  $q$ . Our construction is a recursive combination of asymmetric binary strategies. The crux is to combine the experts one-vs-all, with the expert with lowest prior vs the rest. Note that we may always assume that the number of experts  $K$  is finite (in fact  $K \leq \sqrt{T}$ ), as the bound trivially holds for each expert  $k$  with  $-c \ln q(k) \geq \sqrt{T}$ .

Fix a prior  $q(k)$  on  $k = 1, \dots, K$  ordered by increasing probability. In this section we for simplicity work from the  $(\sqrt{-\ln p}, \sqrt{-\ln(1-p)})$  trade-off (this is achievable, see Section 4.1). We combine the expert with smallest prior with the recursive combination of the others. We employ the combination parametrised by  $p = q(1)^{-c}$  for some fixed universal constant  $c$  determined below. We claim that this combination guarantees  $R_T^k \leq \sqrt{-cT \ln q(k)}$  for each  $k$ . The proof is by induction. The

recursive combination that combines expert 1 vs the rest, guarantees regret w.r.t. expert 1 bounded by

$$\sqrt{-cT \log q(1)}$$

and that w.r.t. each expert  $k > 1$  by

$$\sqrt{-T \log(1 - q(1)^c)} + \sqrt{-cT \log \frac{q(k)}{1 - q(1)}}$$

It remains to show that we can choose  $c$  such that

$$\sqrt{-T \log(1 - q(1)^c)} + \sqrt{-cT \log \frac{q(k)}{1 - q(1)}} \leq \sqrt{-cT \log q(k)}$$

that is

$$\sqrt{-\log(1 - q(1)^c)} \leq \sqrt{-c \log q(k)} - \sqrt{-c \log \frac{q(k)}{1 - q(1)}}.$$

As the square root is concave the right-hand side increases with  $q(k) \geq q(1)$ , so we need to show

$$\sqrt{-\log(1 - q(1)^c)} \leq \sqrt{-c \log q(1)} - \sqrt{-c \log \frac{q(1)}{1 - q(1)}}.$$

It is rather complicated to determine analytically the least  $c$  that achieves this for all  $q \leq 1/3$ , or get a good bound. However, a straightforward numerical plot shows that  $c = 2.51202$  is sufficient.
